# Supplementary material
Source: publisher figshare collection journal article supplement (https://frontiersin.figshare.com/ndownloader/files/21785328)
Supplement: Supplementary file [file 21785328]

# Supplementary Material

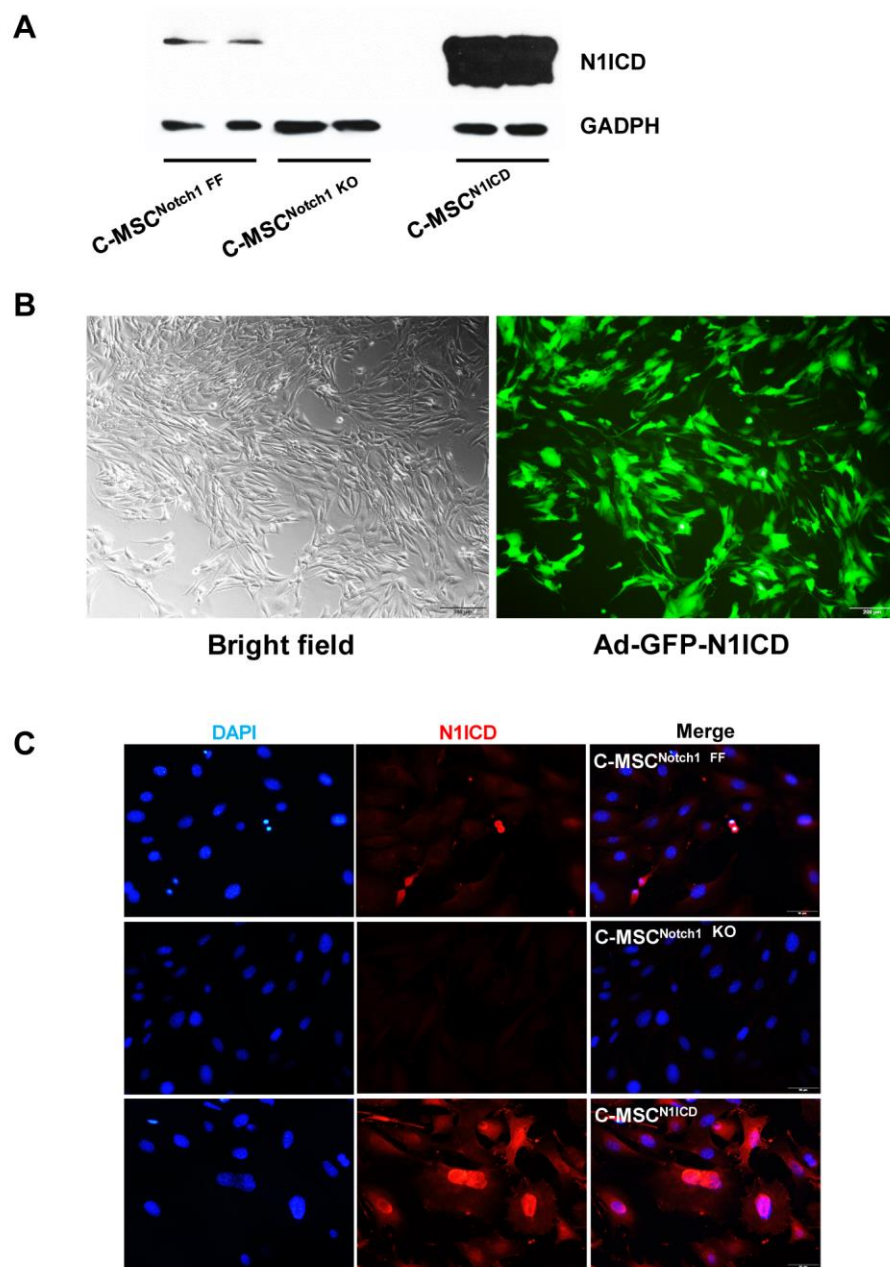

**Supplemental Fig.S1 Overexpression of Notch1 intracellular domain (N1ICD) in Cardiac Mesenchymal stem cells (C-MSC).** (A) Representative western blot images of N1ICD expression in C-MSC from Notch1flox mice, Notch1 knock out C-MSC and N1ICD overexpressing C-MSC. (B) Ad-green fluorescence protein (GFP)-N1ICD was infected into C-MSC. Transfection efficiency was monitored by fluorescence microscopy. Bar = 200  $\mu$ m. (C) Representative immunofluorescence images of N1ICD expression in C-MSC from Notch1 flox mice, Notch1 knock out C-MSC and N1ICD overexpressing C-MSC. Bar = 50  $\mu$ m.

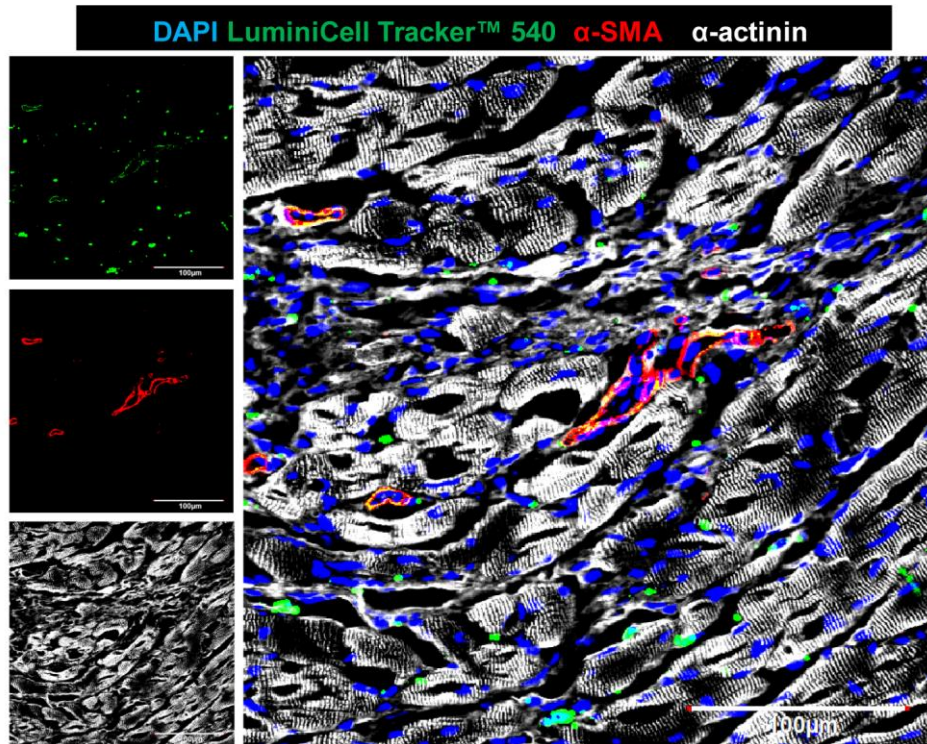

**Supplemental Fig.S2** N1ICD overexpressing C-MSC differentiated into smooth muscle cells after in vivo transplantation in infarcted mouse heart. Cells were labeled with LuminiCell Tracker™ 540. Co-localization cell tracker and  $\alpha$ -SMA staining was observed indicating cells were differentiated into smooth muscle cells and formed vessels. Bar = 100  $\mu$ m.

**A**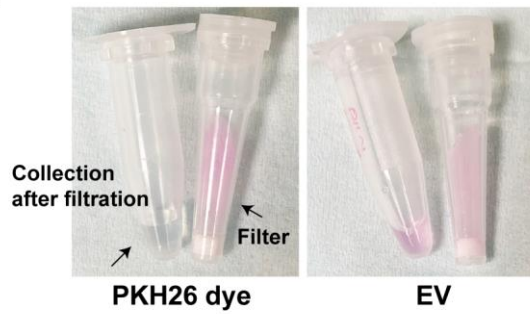**B**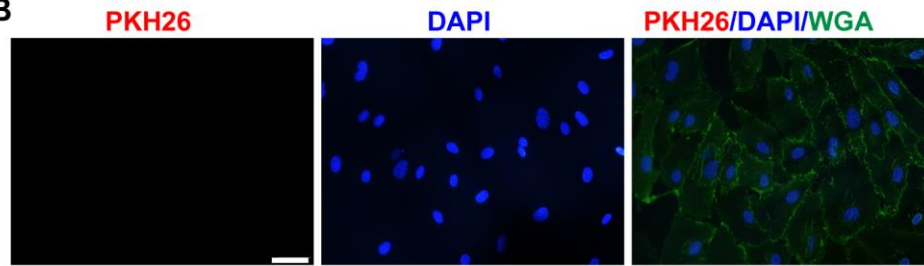

**Supplemental Fig.S3 Excess dye removal for EV labeling.** (A) Appearance of Filtration fluid of PKH26 labeled EV or PKH26 dye. (B) No PKH26 dye signal was detected in endothelia cells incubated filtration fluid of PKH26 dye. Bar = 50  $\mu\text{m}$ .

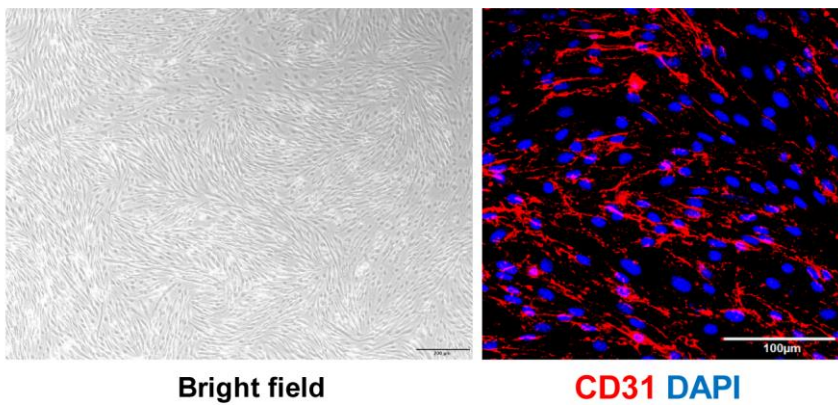

**Supplemental Fig.S4 Characterization of mouse aortic endothelial cells.** Representative bright field image of mouse aortic endothelial cells (Bar = 200  $\mu\text{m}$ ) and immunofluorescence image of CD31 expression in mouse aortic endothelial cells (Bar = 100  $\mu\text{m}$ ).
